# Supplementary material
Source: publisher site journal article supplement (http://zookeys.pensoft.net/article/5680/download/suppl/37/)
Supplement: Supplementary file 1

Research Article
